# Supplementary material for: Evaluation of the ejector two-stage compression refrigeration cycle with work performance from energy, conventional exergy and advanced exergy perspectives
Source: Research Square preprint supplement (doi:10.21203/rs.3.rs-1420949/v1), 2022-03-15
Supplement: Supplementary file 1 [file ad9d5a33828559552544a257.xlsx]

## Sheet: Sheet1
Equipment	(kW)	(kW)	(kW)	(kW)	/%	/%
LPC	6.281	5.549	0.7321	-	88.3458	11.9091
HPC	5.222	4.509	0.7136	-	86.3462	11.6082
GC	1.775	1.461	0.3139	-	82.3099	5.10622
EJE 1	1.757	0.4089	1.348	-	23.2726	21.928
EV 1	5.09	4.108	0.9824	-	80.7073	15.9807
EV 2	0.7637	0.5991	0.1647	-	78.447	2.67918
ITC	0.8945	0.3155	0.579	-	35.2711	9.41862
ITE	0.4628	0.08167	0.3811	-	17.6469	6.19937
EVA	3.632	2.754	0.8781	-	75.826	14.2841
TES	-	-	-	-	-	-
Total	11.503	2.754	6.0929	2.6561	-	100
	0.2394
						LPC	0.7321										en p
						HPC	0.7321							0.9432			4.08		ej	0.0274843
						GC	0.3139							0.16			0.4627		hpc	0.0819925
						EJE 1	1.384							1.208			0.1687		lpc	0.471284
						EV 1	0.9824							0.8781			2.7539		eva	0.117128
						EV 2	0.1647							0.145			1.451		e2	0.00707266
						ITC	0.579							0.551			3.802		itc	0.430421
						ITE	0.3811							0.379			0.05421		e1	0.0346599
						EVA	0.8781							0.3584			0.01883		gc	0.00315036
														1.072			5.101		ite	0.199009
														5.6947			17.8923
			p,k				d	f	p	UN d/p	zongD	en d	ex d	av	un	un en	un ex	av en	av ex
			4.108			e1	0.922	5.09	4.108	0.22444	0.9824	0.9432	0.0392	0.0604	0.922	0.915716	0.00628432	0.0274843	0.0329157	0.0200323
			0.5991			e2	0.3708	0.6718	0.5027	0.225	0.1647	0.1861	-0.0214	0.0005	0.1642	0.104108	0.0600925	0.0819925	-0.0814925	0.0597613
			0.4089			ej	1.193	1.676	0.2918	4.08842	1.3488	1.161	0.1878	0.477046	0.871754	0.689716	0.182038	0.471284	0.0057623	0.343502
			2.754		UN	eva	0.761	3.632	2.754	0.276325	0.8781	0.8781	0	0.1171	0.761	0.760972	2.76325e-05	0.117128	-2.76325e-05	0.08537
			1.461			gc	0.2859	1.788	1.379	0.207324	0.3139	0.3079	0.006	0.0109994	0.302901	0.300827	0.00207324	0.00707266	0.00392676	0.005155
			4.509			hpc	0.1993	4.474	4.424	0.0450497	0.7136	0.6017	0.1119	0.510471	0.203129	0.171279	0.0318502	0.430421	0.0800498	0.313718
			0.3155			itc	0.7004	0.8809	0.1017	6.88692	0.579	0.408	0.171	0.109	0.47	0.37334	0.0966599	0.0346599	0.0743401	0.0252623
			0.08167			ite	0.3615	0.458	0.07874	4.59106	0.3811	0.0896	0.2915	0.0061482	0.374952	0.0864496	0.288502	0.00315036	0.00299784	0.00229618
			5.549			lpc	0.5072	5.54	5.328	0.0951952	0.7321	0.6846	0.0475	0.203862	0.528238	0.485591	0.0426474	0.199009	0.00485255	0.145051
			p,k				d	f	p	UN d/p	zongD	en d	ex d	av	un	un en	un ex	av en	av ex
			4.108			e1	0.922	5.09	4.108	0.22444	0.9824	0.9432	0.0392	0.0604	0.922	0.915716	0.00628432	0.0274843	0.0329157
			0.5991			e2	0.3708	0.6718	0.5027	0.225	0.1647	0.1861	-0.0214	0.0005	0.1642	0.104108	0.0600925	0.0819925	-0.0814925
			0.4089			ej	1.193	1.676	0.2918	4.08842	1.3488	1.161	0.1878	0.477046	0.871754	0.689716	0.182038	0.471284	0.0057623
			2.754		UN	eva	0.761	3.632	2.754	0.276325	0.8781	0.8781	0	0.1171	0.761	0.760972	2.76325e-05	0.117128	-2.76325e-05
			1.461			gc	0.2859	1.788	1.379	0.207324	0.3139	0.3079	0.006	0.0109994	0.302901	0.300827	0.00207324	0.00707266	0.00392676
			4.509			hpc	0.1993	4.474	4.424	0.0450497	0.7136	0.6017	0.1119	0.510471	0.203129	0.171279	0.0318502	0.430421	0.0800498
			0.3155			itc	0.7004	0.8809	0.1017	6.88692	0.579	0.408	0.171	0.109	0.47	0.37334	0.0966599	0.0346599	0.0743401
			0.08167			ite	0.3615	0.458	0.07874	4.59106	0.3811	0.0896	0.2915	0.0061482	0.374952	0.0864496	0.288502	0.00315036	0.00299784
			5.549			lpc	0.5072	5.54	5.328	0.0951952	0.7321	0.6846	0.0475	0.203862	0.528238	0.485591	0.0426474	0.199009	0.00485255
							5.3011	24.2107			6.0937	5.2602	0.8335	1.49553	4.59817	3.888	0.710175	1.3722	0.123325
			1.461	en p		gc	0.2859	1.788	1.379	0.207324	0.3139	0.3079	0.006	0.0109994	0.302901	0.300827	0.00207324	0.00707266	0.00392676
			1.304	1.271	9		0.1852	1.692	1.507	0.122893	0.1961	0.1646	0.0315	0.0358473	0.160253	0.156197	0.00405547	0.00840279	0.0274445
			1.31	1.277	9.333		0.2985	1.799	1.501	0.198867	0.3262	0.2692	0.057	0.0656837	0.260516	0.253954	0.00656262	0.0152463	0.0504374
			1.316	1.283	9.667		0.4077	1.907	1.499	0.271981	0.4506	0.3883	0.0623	0.0926726	0.357927	0.348952	0.00897538	0.039348	0.0533246
			1.323	1.289	10		0.5129	2.014	1.501	0.341706	0.5697	0.5026	0.0671	0.117624	0.452076	0.440458	0.011618	0.0621416	0.055482
			1.33	1.296	10.33		0.6141	2.118	1.504	0.408311	0.6843	0.6125	0.0718	0.141246	0.543054	0.529171	0.0138826	0.0833287	0.0579174
			1.336	1.303	10.67		0.7116	2.22	1.509	0.471571	0.7945	0.7184	0.0761	0.164482	0.630018	0.614456	0.0155618	0.103944	0.0605382
			1.343	1.31	11		0.8057	2.319	1.514	0.532166	0.9008	0.8206	0.0802	0.1861	0.7147	0.697138	0.0175615	0.123462	0.0626385
			1.35	1.317	11.33		0.8967	2.416	1.519	0.590323	1.004	0.9196	0.0844	0.207065	0.796935	0.777455	0.0194806	0.142145	0.0649194
			1.357	1.323	11.67		0.9847	2.509	1.525	0.645705	1.103	1.015	0.088	0.226778	0.876222	0.854268	0.021954	0.160732	0.066046
			1.364	1.33	12		1.07	2.601	1.531	0.69889	1.2	1.109	0.091	0.246715	0.953285	0.929523	0.0237622	0.179477	0.0672378
			p,k				d	f	p	UN d/p	zongD	en d	ex d	av	un	un en	un ex	av en	av ex
			1.39	1.396	303		0.1554	1.59	1.435	0.0732927	0.1886	0.1832	0.0054	0.0380732	0.150527	0.102317	0.0482102	0.0808834	-0.0428102
			1.401	1.456	304		0.1808	1.625	1.444	0.0902078	0.2133	0.1579	0.0554	0.0378839	0.175416	0.131342	0.0440736	0.0265575	0.0113264
			1.412	1.468	305		0.2075	1.663	1.455	0.107612	0.239	0.1831	0.0559	0.0376323	0.201368	0.157974	0.0433937	0.025126	0.0125063
			1.426	1.483	306		0.2355	1.704	1.468	0.125422	0.266	0.2095	0.0565	0.0372377	0.228762	0.186001	0.0427609	0.0234987	0.0137391
			1.442	1.499	307		0.2656	1.748	1.483	0.144096	0.2948	0.2377	0.0571	0.036543	0.258257	0.216001	0.0422565	0.0216995	0.0148435
			1.461	1.519	308		0.2985	1.799	1.501	0.163867	0.3262	0.2683	0.0579	0.0356547	0.290545	0.248915	0.0416307	0.0193854	0.0162693
			1.485	1.544	309		0.3353	1.858	1.523	0.185158	0.3612	0.3024	0.0588	0.034266	0.326934	0.285883	0.0410507	0.0165167	0.0177493
			1.516	1.576	310		0.3779	1.929	1.551	0.208649	0.4016	0.3416	0.06	0.0322277	0.369372	0.328831	0.040541	0.0127688	0.019459
			1.557	1.619	311		0.4295	2.018	1.588	0.235466	0.4506	0.3889	0.0617	0.0294844	0.421116	0.381219	0.0398961	0.00768055	0.0218039
			1.615	1.679	312		0.4954	2.137	1.641	0.266889	0.513	0.4491	0.0639	0.0254491	0.487551	0.448107	0.0394441	0.000993215	0.0244559
		f,k	p,k				d	f	p	UN d/p	zongD	en d	ex d	av	un	un en	un ex	av en	av ex
		3.632	2.4	2.4	1.2		1.063	3.373	2.31	0.460173	1.232	1.232	0	0.127584	1.10442	1.10442	0	0.127584	0
		3.478	2.4	2.4	1.289		0.928	3.238	2.31	0.401732	1.078	1.078	0	0.113844	0.964156	0.964156	0	0.113844	0
		3.334	2.4	2.4	1.378		0.801	3.111	2.31	0.346753	0.934	0.934	0	0.101792	0.832208	0.832208	0	0.101792	0
		3.199	2.4	2.4	1.467		0.681	2.991	2.31	0.294805	0.799	0.799	0	0.0914675	0.707532	0.707532	0	0.0914675	0
		3.072	2.4	2.4	1.556		0.567	2.877	2.31	0.245455	0.672	0.672	0	0.0829091	0.589091	0.589091	0	0.0829091	0
		2.951	2.4	2.4	1.644		0.458	2.768	2.31	0.198268	0.551	0.551	0	0.0751558	0.475844	0.475844	0	0.0751558	0
		2.837	2.4	2.4	1.733		0.355	2.665	2.31	0.15368	0.437	0.437	0	0.0681688	0.368831	0.368831	0	0.0681688	0
		2.729	2.4	2.4	1.822		0.256	2.566	2.31	0.110823	0.329	0.329	0	0.063026	0.265974	0.265974	0	0.063026	0
		2.625	2.4	2.4	1.911		0.161	2.471	2.31	0.069697	0.225	0.225	0	0.0577273	0.167273	0.167273	0	0.0577273	0
		2.526	2.4	2.4	2		0.07	2.38	2.31	0.030303	0.126	0.126	0	0.0532727	0.0727273	0.0727273	0	0.0532727	0
		f,k	p,k				d	f	p	UN d/p	zongD	en d	ex d	av	un	un en	un ex	av en	av ex
		1.961	1.682	1.672	2		0.07897	1.738	1.659	0.047601	0.2794	0.2092	0.0702	0.199335	0.0800648	0.0795888	0.00047601	0.129611	0.069724
		2.551	2.204	2.187	2.3		0.09962	2.264	2.164	0.0460351	0.347	0.259	0.088	0.245539	0.101461	0.100679	0.000782597	0.158321	0.0872174
		3.13	2.721	2.696	2.7		0.1189	2.78	2.662	0.0446657	0.4096	0.305	0.1046	0.288065	0.121535	0.120419	0.00111664	0.184581	0.103483
		3.707	3.237	3.204	3		0.1373	3.294	3.157	0.0434907	0.4695	0.3491	0.1204	0.328721	0.140779	0.139344	0.00143519	0.209756	0.118965
		4.288	3.759	3.716	3.3		0.1552	3.81	3.655	0.0424624	0.5287	0.3929	0.1358	0.369084	0.159616	0.15779	0.00182588	0.23511	0.133974
		4.881	4.292	4.239	3.7		0.1727	4.333	4.161	0.0415044	0.5888	0.4378	0.151	0.410663	0.178137	0.175937	0.00219974	0.261863	0.1488
		5.493	4.842	4.777	4		0.1903	4.87	4.68	0.0406624	0.6514	0.4849	0.1665	0.454513	0.196887	0.194244	0.00264306	0.290656	0.163857
		6.132	5.415	5.337	4.3		0.208	5.426	5.218	0.039862	0.7177	0.5353	0.1824	0.501847	0.215853	0.212744	0.00310924	0.322556	0.179291
		6.808	6.019	5.926	4.7		0.2262	6.008	5.782	0.0391214	0.7891	0.5903	0.1988	0.553628	0.235472	0.231833	0.00363829	0.358467	0.195162
		7.531	6.664	6.555	5		0.245	6.625	6.38	0.0384013	0.8674	0.6512	0.2162	0.611494	0.255906	0.25172	0.00418574	0.39948	0.212014
		0.1529	1.295	9
		0.2776	1.301	9.333
		0.3967	1.308	9.667		HPC	0.7136			lpc	1.74				lpc	0.588563			1.74	1.072	0.616092
		0.511	1.314	10		LPC	1.74			ej	1.3488				hpc	0.356709			0.7136	0.551	0.772141
		0.621	1.321	10.33		GC	0.3139			e1	0.9824				ej	0.146653			0.3139	0.145	0.461931
		0.7269	1.328	10.67		EJE	1.3488			eva	0.8781				itc	0.0750521			1.348	1.208	0.896142
		0.8292	1.335	11		EV1	0.9824			hpc	0.7136				eva	0.0734301			0.9824	0.9432	0.960098
		0.9282	1.342	11.33	9	EV2	0.1647			itc	0.579				e2	0.049255			0.1647	0.16	0.971463
		1.024	1.349	11.67	9.333	ITC	0.579			ite	0.3811				e1	0.0174349			0.579	0.379	0.654577
		1.117	1.356	12	9.667	ITE	0.3811			gc	0.3139				gc	0.00401958			0.3811	0.3548	0.930989
					10	EVA	0.8781			e2	0.1647				ite	0.00239931			0.8781	0.8781	1
					10.33														7.101	5.691	0.801436
					10.67
					11
					11.33
					11.67							un en	un ex	av en	av ex
					12						e1	0.925765	-0.0159462	0.0174349	0.0551462			\l(9) EV2		\l(9) EV2	\l(8) LPC	\l(7) EVA	\l(6) EV1	\l(5) ITC	\l(4) EJE	\l(3) REG	\l(2) GC	\l(1) HPC
											e2	0.110745	0.053455	0.049255	-0.048755			\l(8) LPC
											ej	1.06135	-0.111916	0.146653	0.252716			\l(7) EVA
											eva	0.65047	0.11053	0.0734301	0.0436699			\l(6) EV1
											gc	0.14098	0.16192	0.00401958	0.00697984			\l(5) ITC
											hpc	0.194291	0.0129129	0.356709	0.149687			\l(4) EJE
											itc	0.303948	0.166052	0.0750521	0.0339479			\l(3) REG
											ite	0.356001	0.0151799	0.00239931	0.00752009			\l(2) GC
											lpc	0.483437	0.0303853	0.588563	0.637615			\l(1) HPC
												4.22698	0.422573	1.31352	1.13853
			Component	(kW)	Splitting the exergy destruction				Combined two splitting approaches
			LPC	1.74	0.9032	0.0792	1.2262	0.5138	0.9258	-0.0159	0.0174	0.0551	1.0065	-0.0118293	0.119709
			HPC	0.7136	0.16	0.0047	0.5064	0.2072	0.1107	0.0535	0.0493	-0.0488	1.02512	-0.015226	0.27544
			GC	0.3139	1.208	0.1408	0.011	0.3029	1.0613	-0.1119	0.1467	0.2527	1.11895	-0.0205886	0.795221
			EJE 1	1.348	0.7239	0.1542	0.3993	0.9494	0.6505	0.1105	0.0734	0.0437	0.427295	0.0550486	0.821417
			EV 1	0.9824	0.145	0.1689	0.0726	0.9098	0.141	0.1619	0.004	0.007	0.984376	0.00923814	0.372137
			EV 2	0.1647	0.551	0.1626	0.005	0.1642	0.1943	0.0129	0.3567	0.1497	1.40458	-0.0203915	0.335192
			ITC	0.579	0.379	0.2	0.109	0.47	0.3039	0.1661	0.0751	0.0339	0.77374	0.0120124	0.411897
			ITE	0.3811	0.3548	0.0263	0.0099	0.3712	0.356	0.0152	0.001	0.0089	1.01078	-0.000126743	0.17443
			EVA	0.8781	1.072	0.668	0.1171	0.761	0.4834	0.0304	0.5886	0.6376	1.2331	-0.0732995	0.549036
			Total	7.101	5.497	1.605	2.452	4.649	4.227	0.4226	1.3121	1.1399			0.28729
			Equipment	(kW)	(kW)	(kW)	(kW)	/%	/%	/%[15]
			LPC	12.7	12.21	0.4849	-	88.35	24.5	28.88
			HPC	4.474	4.424	0.05028	-	86.35	10.1
			GC	1.788	1.379	0.4094	-	82.31	4.43	13.13
			EJE 1	1.676	0.2918	1.384	-	23.27	19	19.65
			EV 1	5.09	4.108	0.9824	-	80.71	13.8	0.65
			EV 2	0.6718	0.5027	0.1691	-	78.45	2.32
			ITC	0.8809	0.2917	0.5892	-	35.27	8.15	-
			ITE	0.458	0.07874	0.3792	-	17.65	5.36	-
			EVA	3.632	2.754	0.8781	-	75.83	12.4	15.67
			TES	-	-	-	-	-	-	22.03
			Total	20.15	2.754	7.101	10.29	13.67	100	100
				0.3524
			Component	(kW)	Splitting the exergy destruction				Combined two splitting approaches
			LPC	1.74	1.072	0.668	1.2262	0.5138	0.9258	-0.0159	0.0174	0.0551
			HPC	0.7136	0.551	0.1626	0.5064	0.2072	0.1107	0.0535	0.0493	-0.0488
			GC	0.3139	0.145	0.1689	0.011	0.3029	1.0613	-0.1119	0.1467	0.2527
			EJE 1	1.348	1.208	0.1408	0.3993	0.9494	0.6505	0.1105	0.0734	0.0437
			EV 1	0.9824	0.9432	0.0392	0.0726	0.9098	0.141	0.1619	0.004	0.007
			EV 2	0.1647	0.16	0.0047	0.005	0.1642	0.1943	0.0129	0.3567	0.1497
			ITC	0.579	0.379	0.2	0.109	0.47	0.3039	0.1661	0.0751	0.0339
			ITE	0.3811	0.3548	0.0263	0.0099	0.3712	0.356	0.0152	0.001	0.0089
			EVA	0.8781	0.8781	0	0.1171	0.761	0.4834	0.0304	0.5886	0.6376
			Total	7.101	5.691	1.41	2.452	4.649	4.227	0.4226	1.3121	1.1399
			lpc	0.5072	12.7	13.02	0.0389555	1.74	0	1.74		1.072	0.668	12.41	0.483437	-0.483437	0.588563	1.15144
			hpc	0.1993	4.474	4.337	0.0459534	0.7136	0	0.7136		0.551	0.1626	4.228	0.194291	-0.194291	0.356709	0.356891
			gc	0.2859	1.788	1.379	0.207324	0.3139	0	0.3139		0.145	0.1689	1.461	0.302901	-0.302901	-0.157901	0.471801
			ej	1.193	1.676	0.5138	2.32192	1.3488	0	1.3488		1.208	0.1408	0.4571	1.06135	-1.06135	0.146653	1.20215
			e1	0.922	5.09	4.163	0.221475	0.9824	0	0.9824		0.9432	0.0392	4.18	0.925765	-0.925765	0.0174349	0.964965
			e2	0.3708	0.6718	0.5406	0.225	0.1647	0.1642	0.0005		0.16	0.0047	0.4922	0.110745	0.053455	0.049255	-0.048755
			itc	0.7004	0.8809	0.1852	3.78186	0.579	0.47	0.109		0.379	0.2	0.08037	0.303948	0.166052	0.0750521	0.0339479
			ite	0.3615	0.458	0.07954	4.54488	0.3811	0	0.3811		0.3548	0.0263	0.07833	0.356001	-0.356001	-0.00120069	0.382301
			eva	0.761	3.632	2.754	0.276325	0.8781	0	0.8781		0.8781	0	2.754	0.761	-0.761	0.1171	0.761
			lpc	0.5072	12.7	13.02	0.0389555	1.74	0.513822	1.22618		1.072	0.668	12.41	0.483437	0.0303853	0.588563	0.637615
			hpc	0.1993	4.474	4.337	0.0459534	0.7136	0.207204	0.506396		0.551	0.1626	4.228	0.194291	0.0129129	0.356709	0.149687
			gc	0.2859	1.788	1.379	0.207324	0.3139	0.302901	0.0109994		0.145	0.1689	0.68	0.14098	0.16192	0.00401958	0.00697984
			ej	1.193	1.676	0.5138	2.32192	1.3488	0.949431	0.399369		1.208	0.1408	0.4571	1.06135	-0.111916	0.146653	0.252716
			e1	0.922	5.09	4.163	0.221475	0.9824	0.909819	0.0725811		0.9432	0.0392	4.18	0.925765	-0.0159462	0.0174349	0.0551462
			e2	0.3708	0.6718	0.5406	0.225	0.1647	0.1642	0.0005		0.16	0.0047	0.4922	0.110745	0.053455	0.049255	-0.048755
			itc	0.7004	0.8809	0.1852	3.78186	0.579	0.47	0.109		0.379	0.2	0.08037	0.303948	0.166052	0.0750521	0.0339479
			ite	0.3615	0.458	0.07954	4.54488	0.3811	0.371181	0.0099194		0.3584	0.0227	0.07833	0.356001	0.0151799	0.00239931	0.00752009
			eva	0.761	3.632	2.754	0.276325	0.8781	0.761	0.1171		0.8781	0	2.7539	0.760972	0	0.117128	0
									4.64956	2.45204		5.6947	1.4069	25.3599	4.33749	0.31207	1.35721	1.09483
				lpc	0.588563	0.43366
				hpc	0.356709	0.262827						lpc	1.22618
				ej	0.146653	0.108055						hpc	0.506396
				eva	0.117128	0.0863009						eva	0.399369
				itc	0.0750521	0.0552992						ite	0.1171
				e2	0.049255	0.0362916						e1	0.109
				e1	0.0174349	0.0128462						itc	0.0725811
				gc	0.00401958	0.00296167						ej	0.0109994
				ite	0.00239931	0.00176784			lpc	0.637615		gc	0.0099194
					1.35721				ej	0.252716		e2	0.0005
					gc	4.54488			hpc	0.149687
					e1	3.78186			e1	0.0551462
					eva	2.32192			itc	0.0339479
					ite	0.276325			ite	0.00752009
					e2	0.225			gc	0.00697984
					itc	0.221475			eva	0
					ej	0.207324			e2	-0.048755
					hpc	0.0459534
					lpc	0.0389555
				LPC	1.072	0.668	1.2262	0.5138	0.4834	0.0304	0.5886	0.6376
				HPC	0.551	0.1626	0.5064	0.2072	0.1943	0.0129	0.3567	0.1497
				GC	0.145	0.1689	0.011	0.3029	0.141	0.1619	0.004	0.007
				EJE 1	1.208	0.1408	0.3993	0.9494	1.0613	-0.1119	0.1467	0.2527
				EV 1	0.9432	0.0392	0.0726	0.9098	0.9258	-0.0159	0.0174	0.0551
				EV 2	0.16	0.0047	0.005	0.1642	0.1107	0.0535	0.0493	-0.0488
				ITC	0.379	0.2	0.109	0.47	0.3039	0.1661	0.0751	0.0339
				ITE	0.3548	0.0263	0.0099	0.3712	0.356	0.0152	0.0024	0.0075
				EVA	0.8781	0	0.1171	0.761	0.761	0	0.1171	0
				Total	5.691	1.41	2.452	4.649	4.3375	0.3121	1.3572	1.0948
				LPC	HPC	GC	EJE 1	EV 1	EV 2	ITC	ITE	EVA
				1.072	0.551	0.145	1.208	0.9432	0.16	0.379	0.3548	0.8781
				0.668	0.1626	0.1689	0.1408	0.0392	0.0047	0.2	0.0263	0
										Ed,tot	Ed,HPC	Ed,GC	Ed,REG	Ed,EJE	Ed,ITC	Ed,EV1	Ed,EVA	Ed,LPC	Ed,EV2
										7.776	0.7366	0.8479	0.5861	2.38	0.9815	1.015	0.3833	0.763	0.08222
				Component		Splitting the exergy destruction				Combined two splitting approaches
				LPC	0.7321	0.6846	0.0475	0.2039	0.5282	0.4856	0.0426	0.199	0.0049		LPC	0.7321	0.6846	0.935118
				HPC	0.7136	0.6017	0.1119	0.5105	0.2031	0.1713	0.0319	0.4304	0.08		HPC	0.7136	0.6017	0.843189
				GC	0.3139	0.3079	0.006	0.011	0.3029	0.3008	0.0021	0.0071	0.0039		GC	0.3139	0.3079	0.980886
				EJE 1	1.3488	1.161	0.1878	0.477	0.8718	0.6897	0.182	0.4713	0.0058		EJE 1	1.3488	1.161	0.860765
				EV 1	0.9824	0.9432	0.0392	0.0604	0.922	0.9157	0.0063	0.0275	0.0329		EV 1	0.9824	0.9432	0.960098
				EV 2	0.1647	0.1861	-0.021	0.0005	0.1642	0.1041	0.0601	0.082	-0.082		EV 2	0.1647	0.1861	1.12993
				ITC	0.579	0.408	0.171	0.109	0.47	0.3733	0.0967	0.0347	0.0743		ITC	0.579	0.408	0.704663
				ITE	0.3811	0.0896	0.2915	0.0061	0.3749	0.0864	0.2885	0.0032	0.003		ITE	0.3811	0.0896	0.235109
				EVA	0.8781	0.8781	0	0.1171	0.761	0.761	0	0.1171	0		EVA	0.8781	0.8781	1
				Total	6.0937	5.2602	0.8335	1.4955	4.5982	3.888	0.7102	1.3722	0.1233		Total	6.0937	5.2602
				Pgc 9-12	109.1	255.4	456.3			Tgc 30-39			456.3			Pgc 水侧流量		Tgc 水侧流量		Pe 空气侧流量
				308.15	9	662.13	299.04	1.3162		304.15	9.3	741.17	278.39	1.2474		0.172739		0.195421
				308.15	9.333	682.89	295.08	1.3017		305.15	9.3	728.01	282.25	1.26		0.177089		0.191181
				308.15	9.667	699.26	292.02	1.2902		306.15	9.3	713.78	286.34	1.2734		0.18045		0.186689
				308.15	10	712.81	289.52	1.2806		307.15	9.3	698.24	290.71	1.2877		0.183196		0.181889
				308.15	10.33	724.36	287.42	1.2723		308.15	9.3	681.07	295.43	1.303		0.185503		0.176704
				308.15	10.67	734.84	285.55	1.2647		309.15	9.3	661.84	300.6	1.3197		0.187557		0.171025
				308.15	11	743.95	283.94	1.258		310.15	9.3	639.96	306.35	1.3383		0.189325		0.164709
				308.15	11.33	752.23	282.51	1.2519		311.15	9.3	614.7	312.86	1.3593		0.190896		0.157558
				308.15	11.67	760.05	281.17	1.2461		312.15	9.3	585.17	320.38	1.3834		0.192368		0.149298
				308.15	12	767.07	279.99	1.2409		313.15	9.3	550.54	329.19	1.4116		0.193664		0.139621
				Pe 1.2-2					223.22
				238.09	1.2	1096.7	31.153	122.93	436.22	0.70745	2.0233
				240.14	1.2889	1088.3	33.462	127.14	436.51	0.72469	2.013		P 4.4
				242.09	1.3778	1080.2	35.786	131.15	436.72	0.74101	2.0032		282.23	4.4	867.89	131.04	223.22	423.84	1.0799	1.7908
				243.95	1.4667	1072.3	38.125	135.01	436.88	0.75653	1.994
				245.73	1.5556	1064.7	40.48	138.71	436.99	0.77133	1.9852
				247.44	1.6444	1057.3	42.851	142.29	437.05	0.78548	1.9767
				249.07	1.7333	1050.1	45.243	145.75	437.06	0.79908	1.9686
				250.65	1.8222	1043	47.654	149.1	437.03	0.81216	1.9609
				252.18	1.9111	1036.1	50.087	152.35	436.96	0.82476	1.9534
				253.65	2	1029.4	52.54	155.52	436.85	0.83694	1.9461
					Pgc gc
					0.245
					0.3261
					0.4209
					0.5183
					0.6615
					0.7146
					0.8114
					0.9068
					1
					1.092
			ej	e1	e2	eva	gc	hpc	itc	ite	lpc
			3.721	0.1129	0.2063	0.8588	1.066	1.224	5.116	0.2862	0.2794	12.8706				3.286	-0.4349	2
			3.313	0.191	0.1947	0.8588	0.9009	1.093	4.38	0.2981	0.347	11.5765				2.973	-0.3392	2.3
			2.948	0.2833	0.1862	0.8588	0.77	1	3.7	0.3102	0.4096	10.4661				2.709	-0.239	2.7
			2.613	0.389	0.1798	0.8588	0.6609	0.9285	3.06	0.3225	0.4695	9.482				2.479	-0.1336	3
			2.299	0.5076	0.1749	0.8588	0.5667	0.8685	2.45	0.3353	0.5287	8.5895				2.278	-0.02185	3.3
			1.999	0.6397	0.1711	0.8588	0.4834	0.8157	1.859	0.3487	0.5888	7.7642				2.097	0.09773	3.7
			1.706	0.7861	0.1681	0.8588	0.4083	0.7675	1.281	0.3627	0.6514	6.9899				1.934	0.2273	4
			1.414	0.948	0.1656	0.8588	0.3394	0.7227	0.7075	0.3775	0.7177	6.2512				1.784	0.3697	4.3
			1.116	1.127	0.1634	0.8588	0.275	0.6802	0.1323	0.3933	0.7891	5.5351				1.645	0.529	4.7
			0.8051	1.327	0.1614	0.8588	0.2141	0.6395	-0.4531	0.4102	0.8674	4.8304				1.516	0.7108	5
		1.251	0.4753	3.721	0.1129	0.2063	0.8588	1.066	1.224	5.116	0.2862	0.2794	3.286	-0.4349	2
		1.286	0.4399	3.313	0.191	0.1947	0.8588	0.9009	1.093	4.38	0.2981	0.347	2.973	-0.3392	2.3
		1.305	0.4052	2.948	0.2833	0.1862	0.8588	0.77	1	3.7	0.3102	0.4096	2.709	-0.239	2.7
		1.313	0.3712	2.613	0.389	0.1798	0.8588	0.6609	0.9285	3.06	0.3225	0.4695	2.479	-0.1336	3
		1.311	0.3379	2.299	0.5076	0.1749	0.8588	0.5667	0.8685	2.45	0.3353	0.5287	2.278	-0.02185	3.3
		1.3	0.3053	1.999	0.6397	0.1711	0.8588	0.4834	0.8157	1.859	0.3487	0.5888	2.097	0.09773	3.7
		1.283	0.2735	1.706	0.7861	0.1681	0.8588	0.4083	0.7675	1.281	0.3627	0.6514	1.934	0.2273	4
		1.258	0.2422	1.414	0.948	0.1656	0.8588	0.3394	0.7227	0.7075	0.3775	0.7177	1.784	0.3697	4.3
		1.228	0.2115	1.116	1.127	0.1634	0.8588	0.275	0.6802	0.1323	0.3933	0.7891	1.645	0.529	4.7
		1.191	0.1811	0.8051	1.327	0.1614	0.8588	0.2141	0.6395	-0.4531	0.4102	0.8674	1.516	0.7108	5
